# Supplementary material
Source: Springer Nature journal article supplement (https://www.springermedizin.de/resource/supplementary/12967_2014_1900_MOESM8_ESM.pdf/9575080)

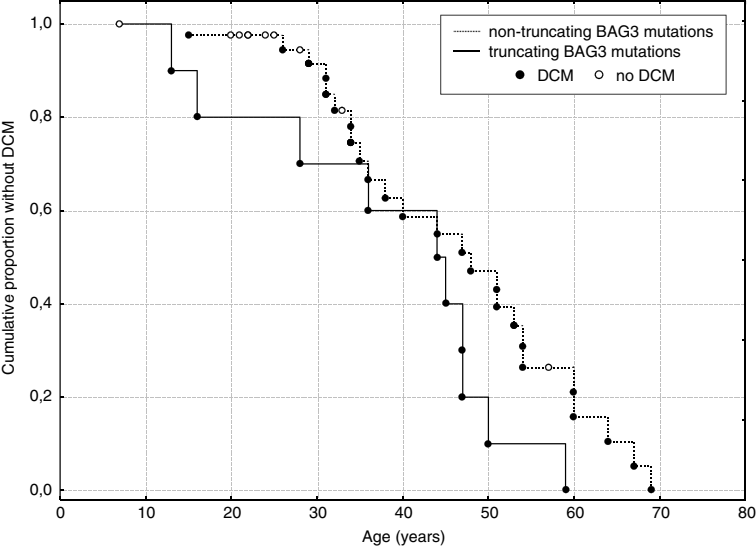

Supplement: MOESM8 [file 9575080]
